# Supplementary material
Source: PubMed Central journal article supplement (PMC3305802)
Supplement: NIHMS359416-supplement-1_si_001.pdf [file NIHMS359416-supplement-1_si_001.pdf]

# Mechanisms and Control of Silk-based Electrospinning

Feng Zhang<sup>†</sup>, Baoqi Zuo<sup>‡</sup>, Zhihai Fan<sup>§</sup>, Zonggang Xie<sup>§</sup>, Qiang Lu<sup>†\*</sup>, Xueguang Zhang<sup>†\*</sup>,

and David L. Kaplan<sup>¶</sup>

<sup>†</sup>Jiangsu Province Key Laboratory of Stem Cell Research, Medical College, <sup>‡</sup>College of Textile and Clothing Engineering, National Engineering Laboratory for Modern Silk <sup>§</sup>Department of Orthopedics, the Second Affiliated Hospital of Soochow University, Suzhou Jiangsu, P.R. China

<sup>¶</sup>Department of Biomedical Engineering, Tufts University, Medford, Massachusetts, United States

Corresponding authors: Xueguang Zhang +86 512 65732002 [xueguangzh@yahoo.com.cn](mailto:xueguangzh@yahoo.com.cn);

Qiang Lu +86 512 68061649 [lvqiang78@suda.edu.cn](mailto:lvqiang78@suda.edu.cn)

## Supporting Information

**Size distribution of SF particles in aqueous solution and formic acid.** The results showed that different nanostructures were formed in various solutions. The size distribution was consistent with the AFM results, confirming the formation of different nanostructures in solution.

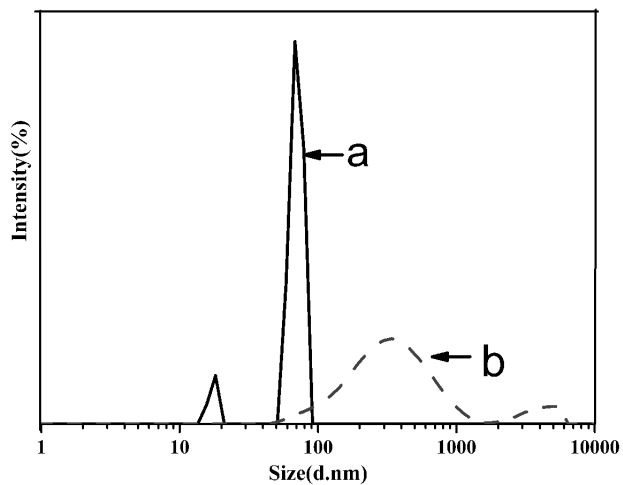

Figure S1. Size distribution of silk fibroin after different treatments: (a) fresh silk fibroin solution; (b) sample (a) slowly concentrated to 25 wt% at room temperature, the drying time was about 4 days. All the samples were diluted to 0.1 wt% to facilitate the DLS measurement.

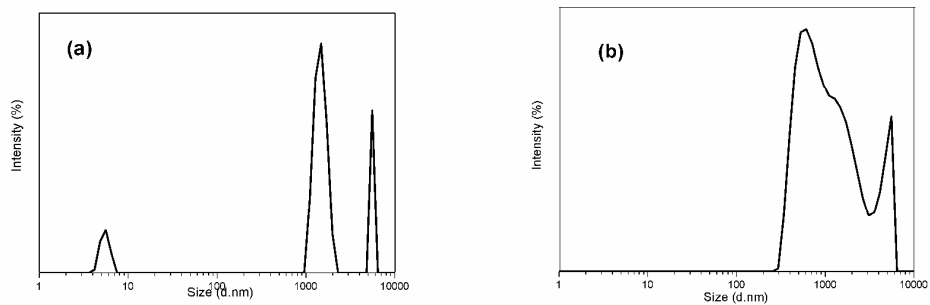

**Figure S2.** Size distribution of SF particles in formic acid. (a) the solution was derived from silk fibroin films prepared by fast drying method, (b) the solution was derived from silk fibroin films prepared by slow drying method.

**FTIR spectra of regenerated silk films.** The FTIR spectra results showed that the regenerated SF films prepared by fast and slow drying methods are mainly composed of random coil and or silk I conformation rather than rich silk II content although nanospheres or nanofibers formed in the films.

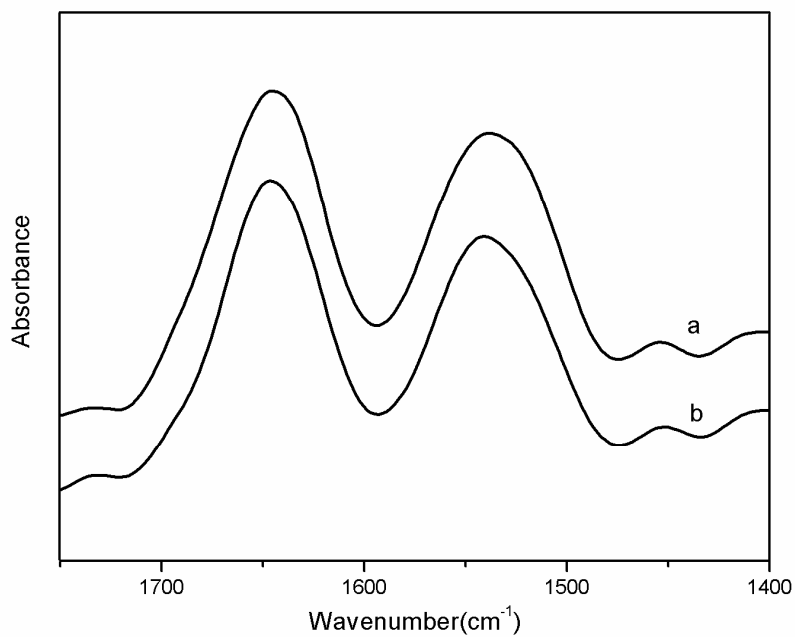

**Figure S3.** FTIR spectra of silk films prepared by fast drying method (a) and slow drying method (b)
